# Supplementary material
Source: ML conference proceedings conference paper supplement (https://openaccess.thecvf.com/content/cvpr_2017/html/Kuznietsov_Semi-Supervised_Deep_Learning_2017_CVPR_paper.html)
Supplement: Supplementary file 1 [file Kuznietsov_Semi-Supervised_Deep_Learning_2017_CVPR_supplemental.pdf]

Archive with 3 entries (3 files):
- cvpr3050_supp_final.pdf
- cvpr3050_supp_vid_final.mp4
- README.txt
