# Supplementary material
Source: ML conference proceedings conference paper supplement (https://openaccess.thecvf.com/content/cvpr_2017/html/Kuznietsov_Semi-Supervised_Deep_Learning_2017_CVPR_paper.html)
Supplement: Supplementary file 1 [file Kuznietsov_Semi-Supervised_Deep_Learning_2017_CVPR_supplemental.pdf › cvpr3050_supp_final.pdf]

# Semi-Supervised Deep Learning for Monocular Depth Map Prediction - Supplementary Material

Yevhen Kuznetsov      Jörg Stückler      Bastian Leibe

Computer Vision Group, Visual Computing Institute, RWTH Aachen University

yevhen.kuznetsov@rwth-aachen.de, { stueckler | leibe }@vision.rwth-aachen.de

## 1. Introduction

In this supplementary material, we provide additional qualitative results of our approach on the KITTI Raw [3], Cityscapes [1] and Make3D [6, 7] datasets.

## 2. KITTI

Figs. 1 and 2 show further qualitative results of our semi-supervised approach and the supervised-only variant on images of the KITTI Raw Eigen test split [2]. In contrast to supervised-only training, our full approach achieves better predictions in the image regions without ground-truth. The predictions of our full model are also smoother and visually more appealing. In Fig. 2, we give examples of failures made by our method in recovering scene structures. In Fig. 3, we also show 3D point cloud visualizations of various results obtained on the test images.

## 3. Generalization to Other Datasets

### 3.1. Cityscapes

Fig. 4 shows qualitative results of our approach (trained on KITTI) on images from the Cityscapes test set initially proposed for semantic segmentation [1]. For reference, we also show the provided stereo depth maps which have been obtained using semi-global matching [4]. We crop the image to its upper part at a size of  $847 \times 2048$  in order to remove the visible parts of the recording vehicle in the lower image part.

In the upper six rows, we demonstrate qualitatively to which degree our KITTI model can generalize to the Cityscapes imagery. The bottom two rows show typical failure cases in which the KITTI model cannot generalize well. These are mainly due to the difference in scene perspectives and objects compared to the training images of KITTI. Notably, the camera setup is different between the KITTI and Cityscapes datasets, having a different aspect ratio of the images, different camera intrinsics, and a different view pose from the vehicle. This means, for instance, that our model may not capture absolute depth well on Cityscapes.

We note that fine-tuning our KITTI model on Cityscapes should improve results.

### 3.2. Make3D

Fig. 5 gives qualitative results of our KITTI model obtained on the Make3D test images for monocular depth estimation [6, 7]. The upper three rows contain examples in which our model is able to capture the shape of foreground objects such as vegetation and cars well. In the bottom row, typical failure cases are shown. These scenes are very different from the ones in the KITTI training dataset. Overall, the camera has a quite different vertical field-of-view compared to KITTI so that the ground is not well recovered by our model in the close ranges at the bottom of the images. Our model also typically makes mistakes in predicting depth in the sky in the upper image regions. The images in Make3D are not taken from an on-road vehicle but scene perspectives vary much more strongly, which renders generalization difficult. We also note that fine-tuning our KITTI model on Make3D in a supervised way should improve results significantly.

### 3.3. NYUDv2

Finally, to also show an expectable limitation of generalization, we provide results of our model (which has been trained on the outdoor scenes on KITTI) on images from the NYUDv2 indoor dataset [8] (see Fig. 6). For visual comparison with the ground-truth depth maps, the scale of our depth predictions has been adapted by a factor of 0.3. We note that Laina *et al.* [5] already demonstrated that the ResNet-50 encoder-decoder architecture employed in our work achieves state-of-the-art results when trained on this dataset in a purely supervised way. Hence, fine-tuning of our model on NYUDv2 in a supervised way could further increase the performance of our model on this dataset.

## References

- [1] M. Cordts, M. Omran, S. Ramos, T. Rehfeld, M. Enzweiler, R. Benenson, U. Franke, S. Roth, and B. Schiele. The

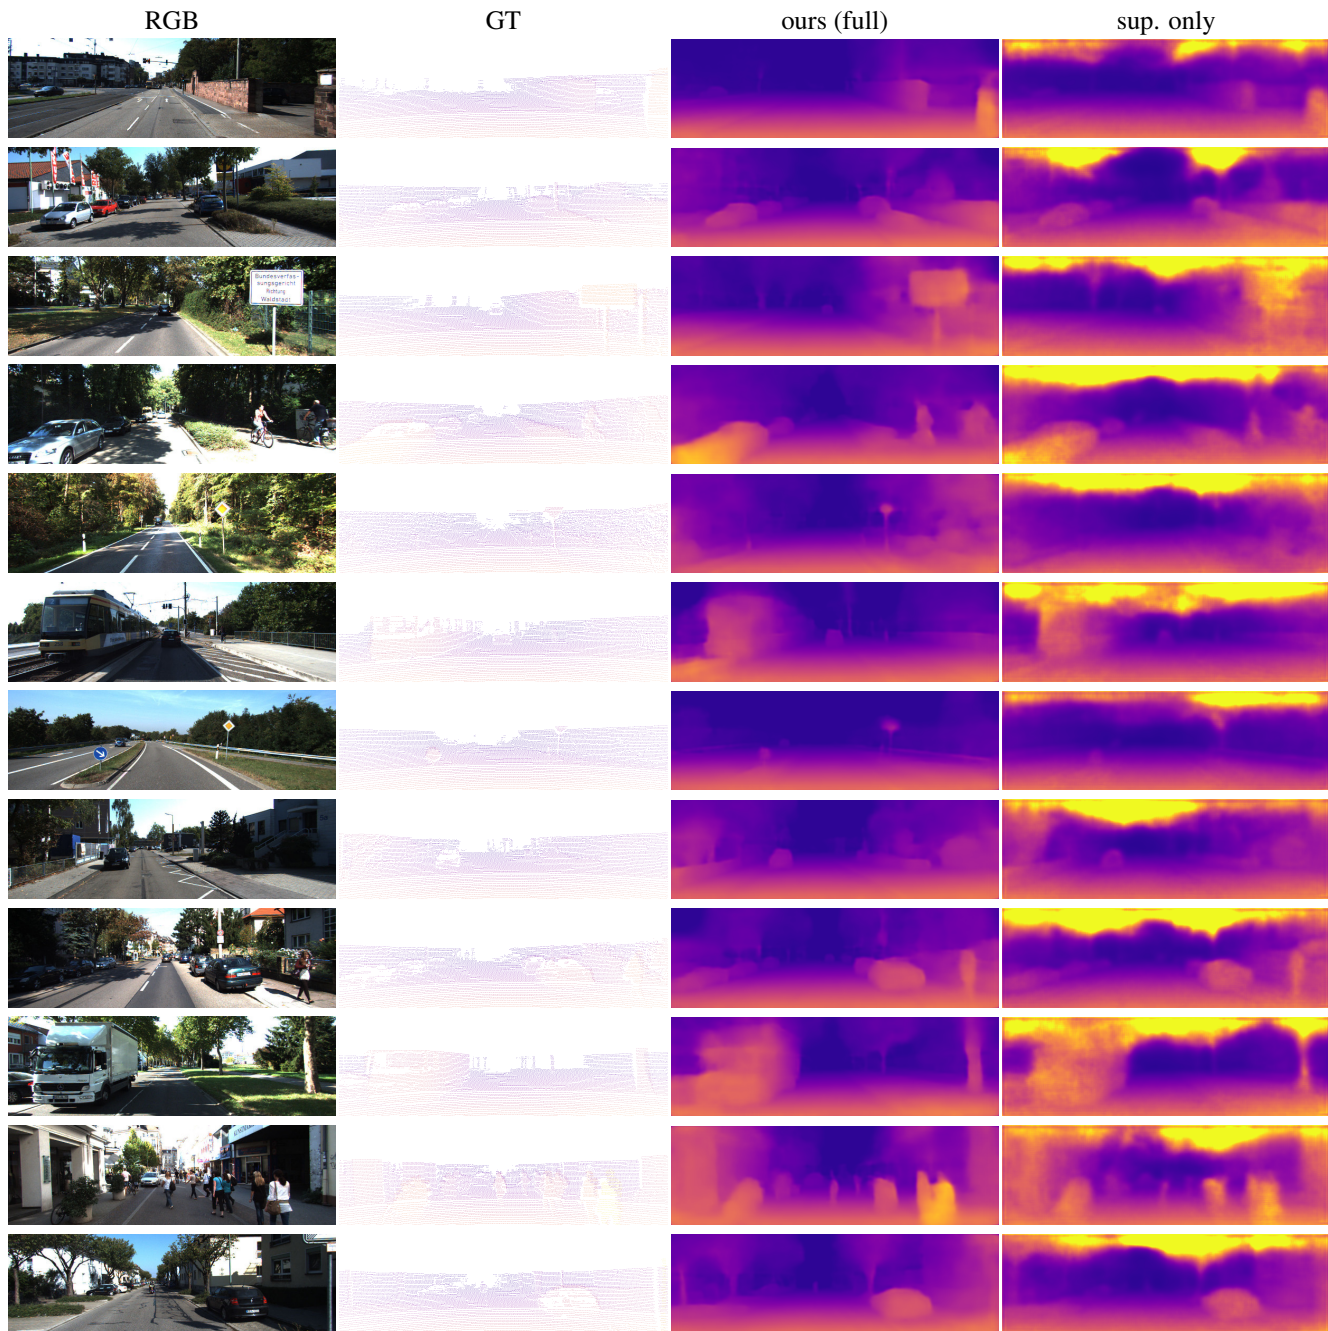

Figure 1. Qualitative results of our approach on the KITTI raw test set. Shown variants are our full semi-supervised model (full) and our model trained supervised only (sup. only). These examples demonstrate qualitatively good results of our full approach. In the supervised-only approach, the ground-truth cannot provide a supervisory training signal for the upper parts of the image.

Cityscapes dataset for semantic urban scene understanding. In *Proc. of the IEEE Int. Conf. on Computer Vision and Pattern Recognition (CVPR)*, 2016.

- [2] D. Eigen, C. Puhrsch, and R. Fergus. Depth map prediction from a single image using a multi-scale deep network. In *Advances of Neural Information Processing Systems (NIPS)*, pages 2366–2374, 2014.
- [3] A. Geiger, P. Lenz, and R. Urtasun. Are we ready for au-

tonomous driving? The KITTI vision benchmark suite. In *Proc. of the IEEE Int. Conf. on Computer Vision and Pattern Recognition (CVPR)*, 2012.

- [4] H. Hirschmüller. Accurate and efficient stereo processing by semi-global matching and mutual information. In *Proc. of the IEEE Int. Conf. on Computer Vision and Pattern Recognition (CVPR)*, pages 807–814, 2005.
- [5] I. Laina, C. Rupprecht, V. Belagiannis, F. Tombari, and

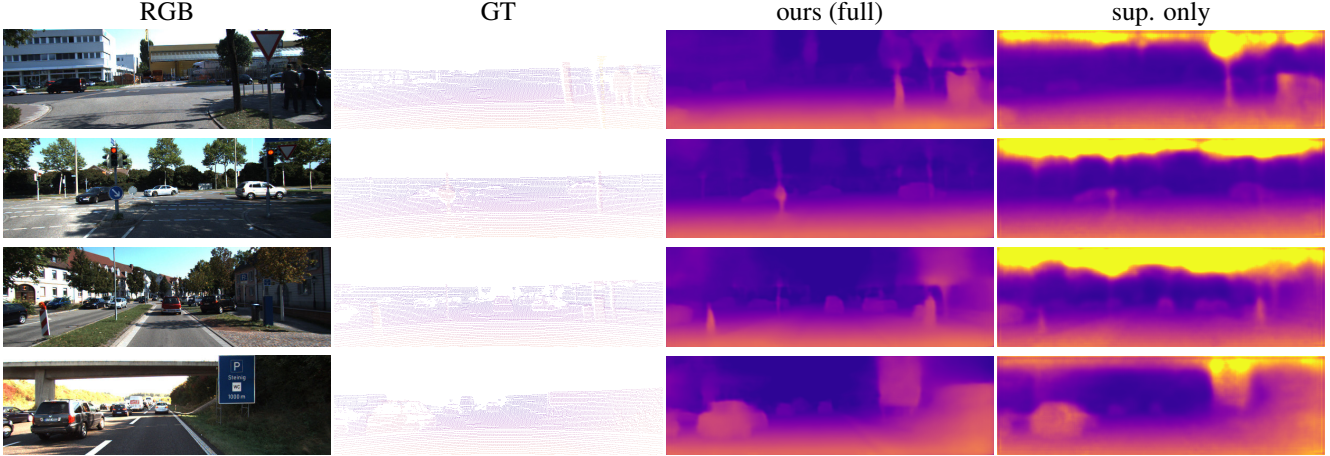

Figure 2. Qualitative results of our approach on the KITTI raw test set. Shown variants are our full semi-supervised model (full) and our model trained supervised only (sup. only). These examples demonstrate failure cases. In the upper three images, a traffic sign, a traffic light and a thin pole are not recovered well by our method. In the lower image, the bridge and the vegetation in the upper right corner are not well estimated. Notably, bridges are structures with typically horizontal edges which provide only few photometric stereo cues.

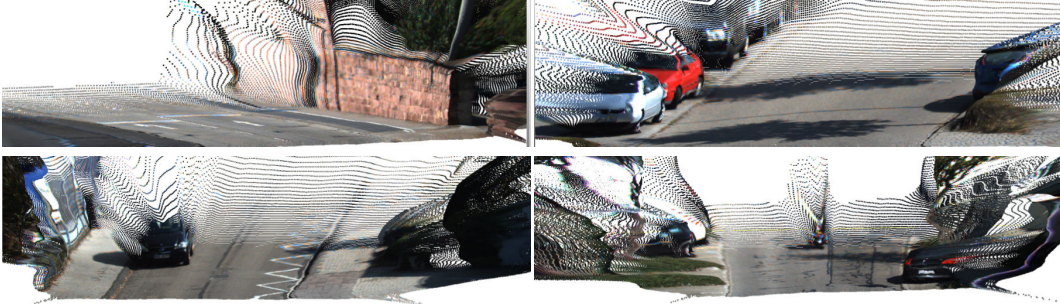

Figure 3. Qualitative results of our semi-supervised approach on the KITTI raw test set visualized as 3D point clouds.

N. Navab. Deeper depth prediction with fully convolutional residual networks. In *Proc. of the Int. Conf. on 3D Vision (3DV)*, 2016.

- [6] A. Saxena, S. H. Chung, and A. Y. Ng. Learning depth from single monocular images. In *Advances of Neural Information Processing Systems (NIPS)*, 2005.
- [7] A. Saxena, M. Sun, and A. Y. Ng. Make3D: Learning 3D scene structure from a single still image. *IEEE Transactions on Pattern Analysis and Machine Intelligence (PAMI)*, 2009.
- [8] N. Silberman, D. Hoiem, P. Kohli, and R. Fergus. Indoor segmentation and support inference from RGBD images. In *Proc. of the European Conf. on Computer Vision (ECCV)*, 2012.

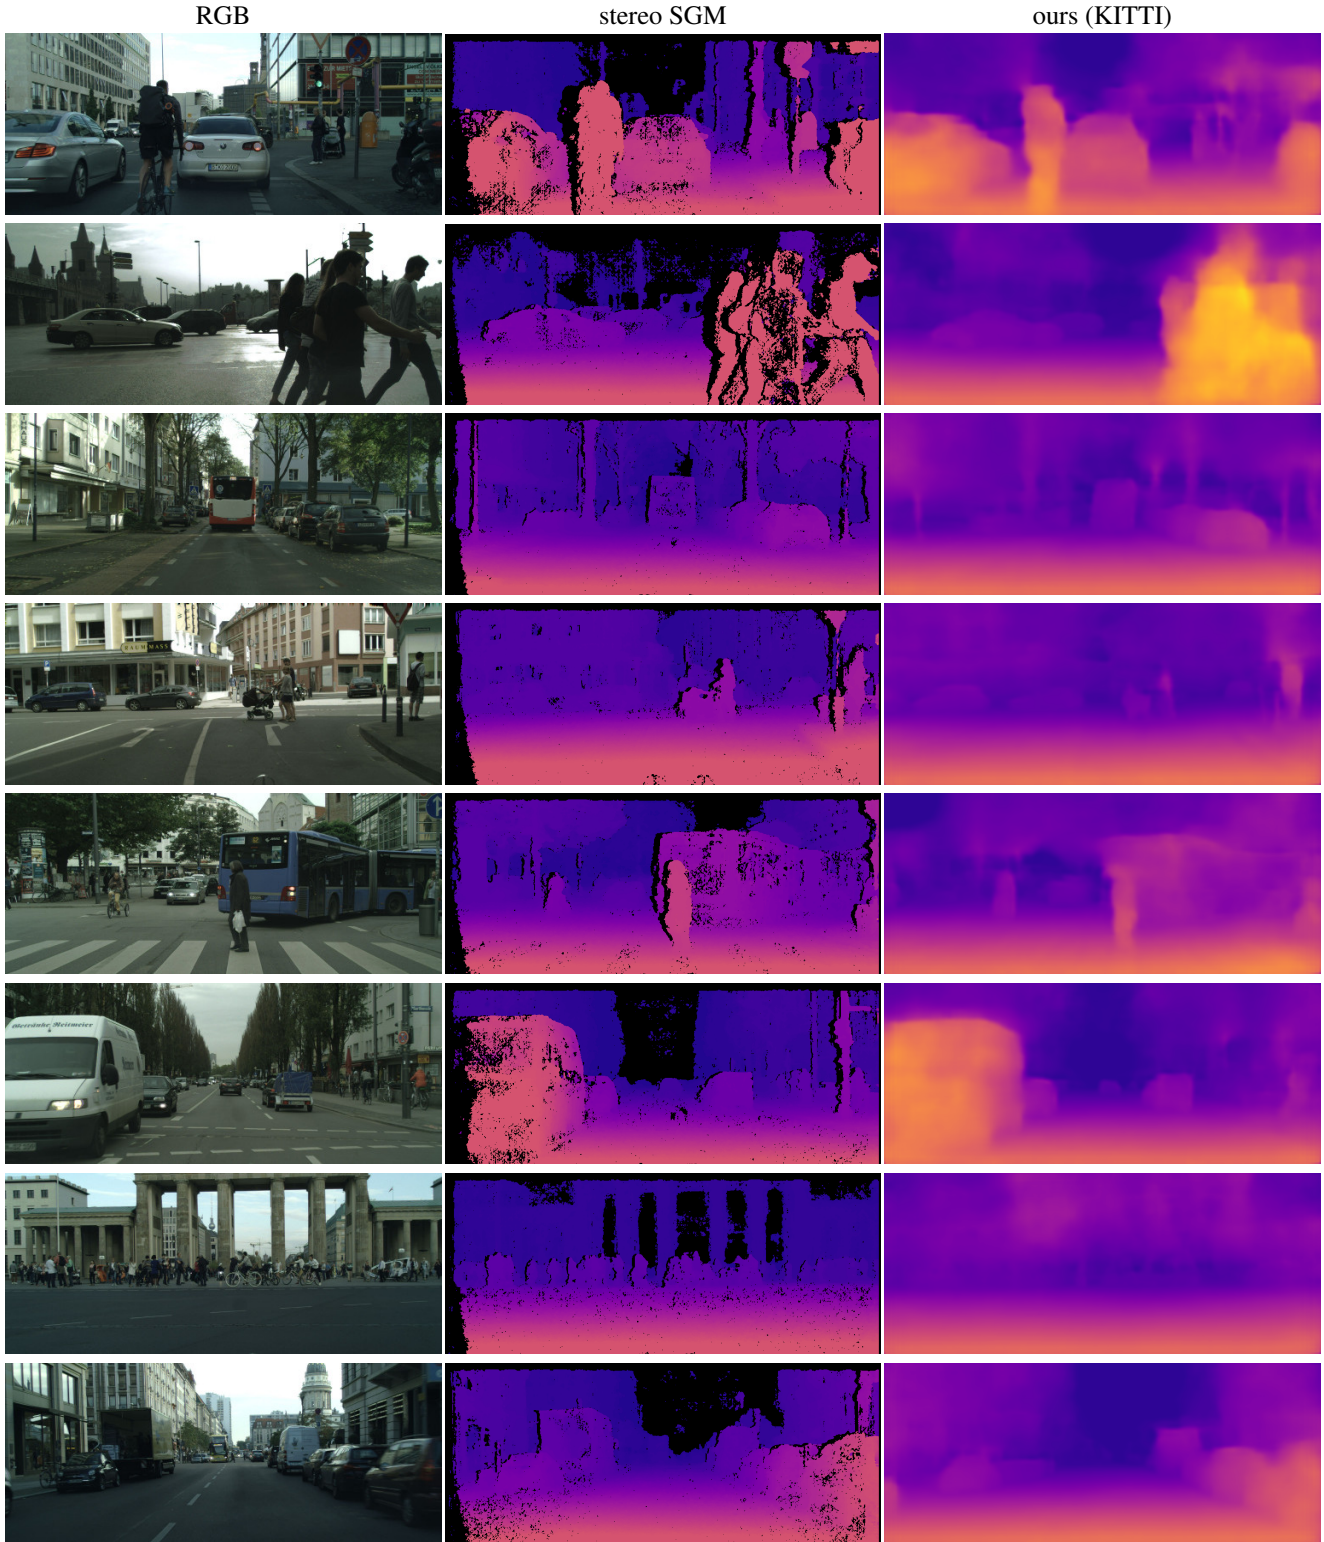

Figure 4. Qualitative results of variants of our approach on the Cityscapes semantic segmentation test set. For reference, we show the depth maps provided with Cityscapes which have been obtained with stereo semi-global matching (SGM, [4]). The upper six rows show qualitatively good results, while the bottom two rows show typical failures.

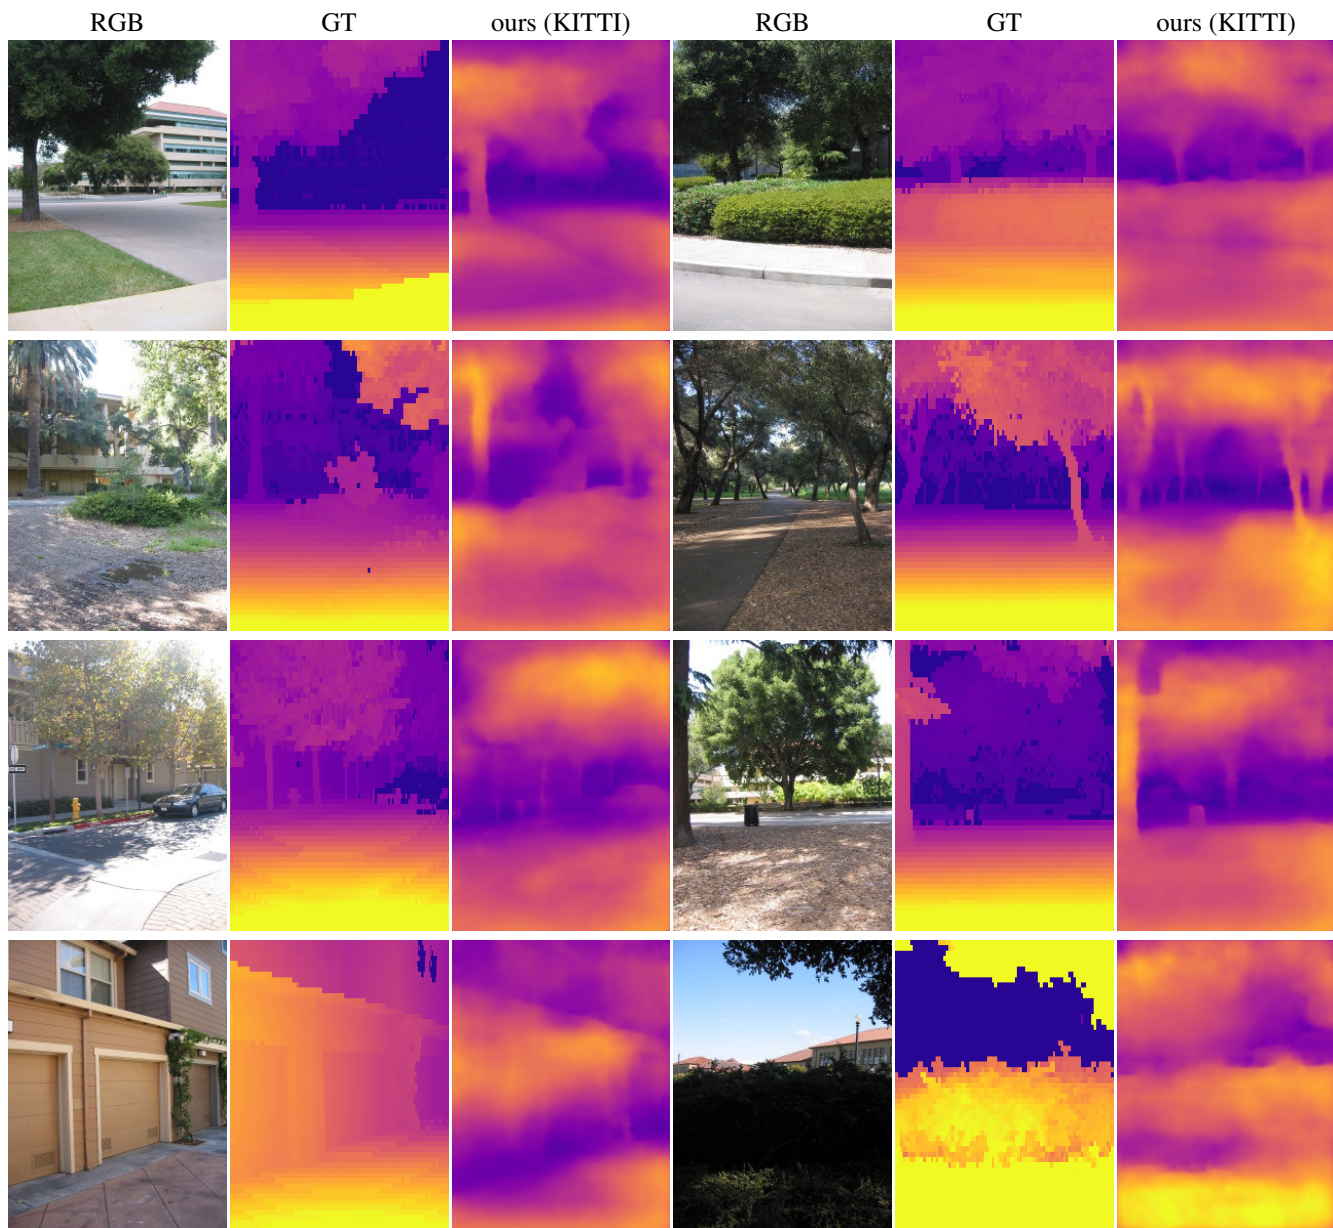

Figure 5. Qualitative results of our approach (trained on KITTI) on images of the Make3D test set.

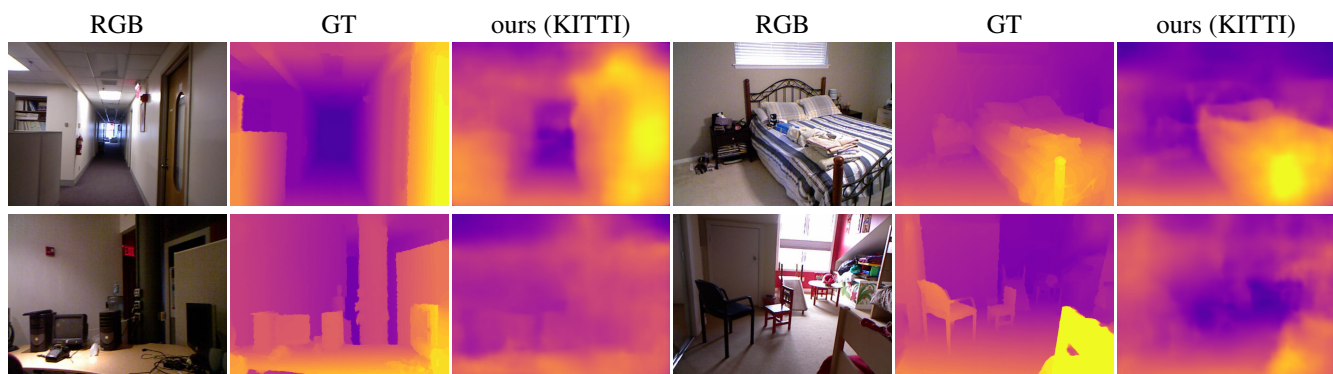

Figure 6. Qualitative results of our approach (trained on KITTI) on images of the NYUDv2 test set used by Laina *et al.* [5].
