# Supplementary material
Source: ML conference proceedings conference paper supplement (https://openaccess.thecvf.com/content/cvpr_2017/html/Kuznietsov_Semi-Supervised_Deep_Learning_2017_CVPR_paper.html)
Supplement: Supplementary file 1 [file Kuznietsov_Semi-Supervised_Deep_Learning_2017_CVPR_supplemental.pdf › README.txt]

Video File: cvpr3050_supp_vid_final.mp4
Codec: H.264
Codec download link: http://www.divx.com/en/software/technologies/h264
